# Supplementary material
Source: PubMed Central journal article supplement (PMC5664152)
Supplement: NIHMS877980-supplement-1.pdf [file NIHMS877980-supplement-1.pdf]

| Patient | CD3                     | CD4                     | CD45RA+<br>CD4          | CD45RA-<br>CD62L+<br>CD4 | CD45RA-<br>CD62L-<br>CD4 | CD8                    | CD45RA+<br>CD8        | CD45RA-<br>CD62L+<br>CD8 | CD45RA-<br>CD62L-<br>CD8 | CD19                  | CD27+<br>B cells | CD16/56<br>NK        | IgG                    | IgA                 | IgM                | IgE                   | AEC                   | Treg | Lymphocyte<br>Proliferation                     |    |
|---------|-------------------------|-------------------------|-------------------------|--------------------------|--------------------------|------------------------|-----------------------|--------------------------|--------------------------|-----------------------|------------------|----------------------|------------------------|---------------------|--------------------|-----------------------|-----------------------|------|-------------------------------------------------|----|
| A-I     | 1914<br>(1000-<br>2200) | 1159<br>(530-<br>1300)  | 961<br>(230-<br>770)    | 169<br>(162-<br>614)     | 28<br>(42-<br>225)       | 686<br>(330-<br>920)   | 642<br>(240-<br>710)  | 20<br>(25-180)           | 26<br>(24-175)           | 125<br>(110-<br>570)  | 11<br>(12-68)    | 115<br>(100-<br>480) | 1019<br>(700-<br>1600) | 304<br>(70-<br>400) | 58<br>(40-<br>230) | 15,600<br>(0-<br>90)  | 1240<br>(40-<br>540)  | nml  | Decreased: Anti-CD3<br>Normal: PHA, PWM         |    |
| B-I     | 2793<br>(1400-<br>3700) | 1476<br>(700-<br>2200)  | 1111<br>(430-<br>1500)  | 347<br>(162-<br>614)     | 21<br>(42-<br>225)       | 946<br>(490-<br>1300)  | 850<br>(380-<br>1100) | 62<br>(25-180)           | 31<br>(24-175)           | 399<br>(390-<br>1400) | 62<br>(12-68)    | 237<br>(130-<br>720) | 617*<br>(500-<br>1250) | 272<br>(25-<br>150) | 16<br>(45-<br>175) | 19,000<br>(0-<br>200) | 1960<br>(30-<br>530)  | nml  | No defect                                       |    |
| B-II.2  | 1849<br>(714-<br>2266)  | 1098<br>(259-<br>1565)  | 678<br>(102-<br>1070)   | 325<br>(162-<br>614)     | 81<br>(42-<br>225)       | 594<br>(178-<br>853)   | 319<br>(96-<br>740)   | 77<br>(25-180)           | 84<br>(24-175)           | 303<br>(59-<br>329)   | 36<br>(12-68)    | 118<br>(126-<br>729) | 1078<br>(700-<br>1600) | 324<br>(70-<br>400) | 57<br>(40-<br>230) | 39.5<br>(0-<br>90)    | 80<br>(30-<br>530)    | nml  | Decreased: Anti-CD3                             |    |
| C-I     | 1542<br>(1000-<br>2200) | 995<br>(530-<br>1300)   | 766<br>(230-<br>770)    | ND                       | ND                       | 471<br>(330-<br>920)   | 363<br>(240-<br>710)  | ND                       | ND                       | 133<br>(110-<br>570)  | 17<br>(12-68)    | 64<br>(100-<br>480)  | 613<br>(700-<br>1600)  | 418<br>(70-<br>400) | 34<br>(40-<br>230) | 3008<br>(0-<br>90)    | 1445<br>(40-<br>540)  | nml  | Decreased:<br>PHA, CONA, tetanus<br>Normal: PWM |    |
| C-II.1  | ND                      | ND                      | ND                      | ND                       | ND                       | ND                     | ND                    | ND                       | ND                       | ND                    | ND               | ND                   | ND                     | ND                  | ND                 | ND                    | ND                    | ND   | nml                                             | ND |
| D-I     | 6266<br>(1900-<br>5900) | 2881<br>(1400-<br>4300) | 3230<br>(1300-<br>3700) | ND                       | ND                       | 2881<br>(500-<br>1700) | ND                    | ND                       | ND                       | 443<br>(610-<br>2600) | ND               | 812<br>(160-<br>950) | 548<br>(300-<br>1100)  | 136<br>(20-<br>75)  | 12<br>(40-<br>150) | 30000<br>(0-<br>50)   | 14000<br>(30-<br>530) | nml  | Decreased:<br>PHA, anti-CD3                     |    |
| D-II.1  | 1684<br>(714-<br>2266)  | 889<br>(259-<br>1565)   | ND                      | ND                       | ND                       | 725<br>(178-<br>853)   | ND                    | ND                       | ND                       | 94<br>(59-<br>329)    | ND               | 444<br>(126-<br>729) | 1430<br>(700-<br>1600) | 472<br>(70-<br>400) | 93<br>(40-<br>230) | 128<br>(0-<br>90)     | 800<br>(30-<br>530)   | nml  | Decreased<br>PHA, anti-CD3                      |    |
| D-II.2  | 1835<br>(1000-<br>2200) | 1066<br>(530-<br>1300)  | ND                      | ND                       | ND                       | 694<br>(330-<br>920)   | ND                    | ND                       | ND                       | 149<br>(110-<br>570)  | 120              | 421<br>(100-<br>480) | 1580<br>(700-<br>1600) | 572<br>(70-<br>400) | 87<br>(40-<br>230) | 1910<br>(0-<br>90)    | 800<br>(40-<br>540)   | nml  | Decreased:<br>PHA, anti-CD3<br>Normal:<br>PWM   |    |

**Supplementary Table 1. Summary of patient laboratory data.** Cell counts in #/uL, (%). \* indicates patients was receiving IVIg. For Treg column: nml indicates normal percentage of CD25+FoxP3+ within CD4 gate. PHA: phytohaemagglutinin. PWM: pokeweed mitogen. ND = not determined.
