# Supplementary material
Source: PubMed Central journal article supplement (PMC5664152)
Supplement: NIHMS877980-supplement-3.pdf [file NIHMS877980-supplement-3.pdf]

**Fig 2F**

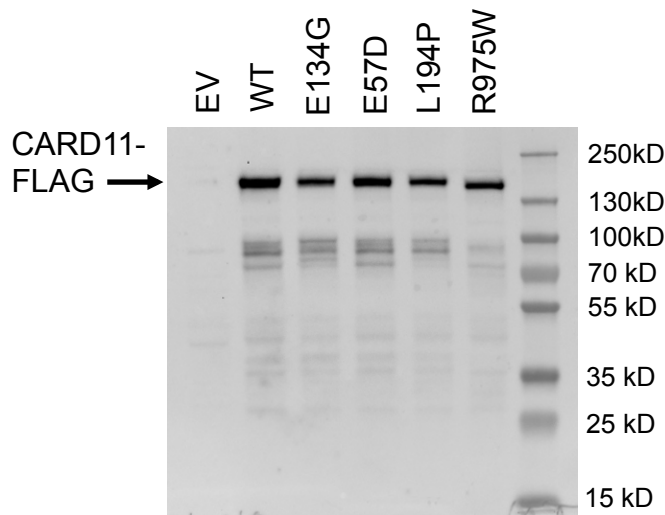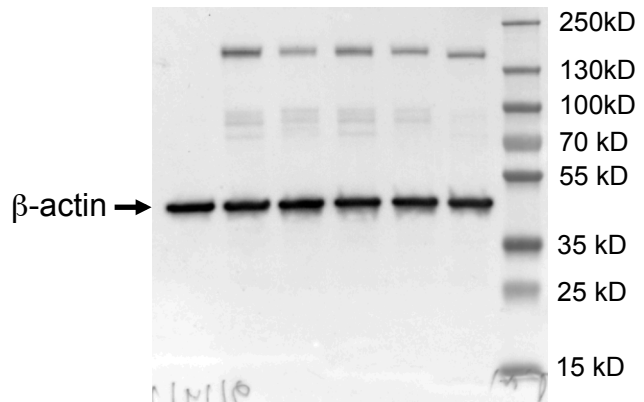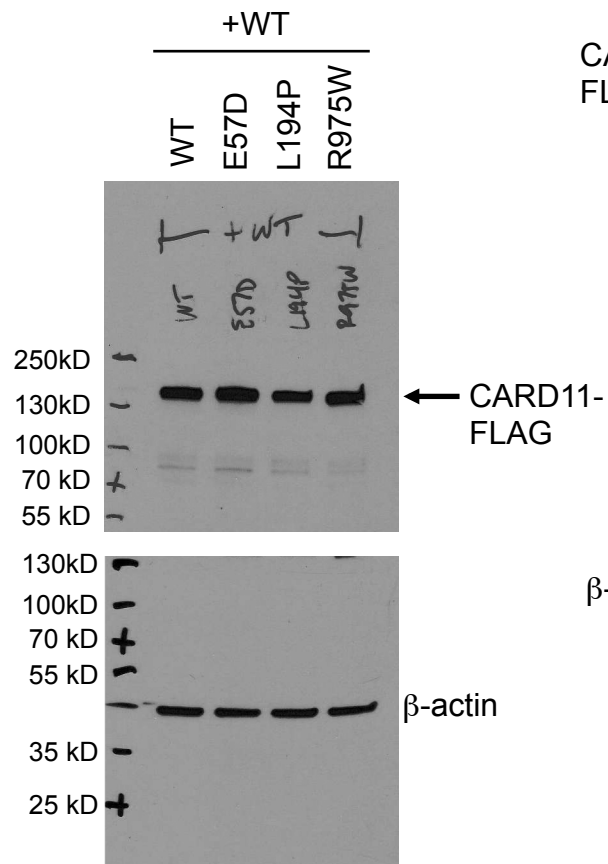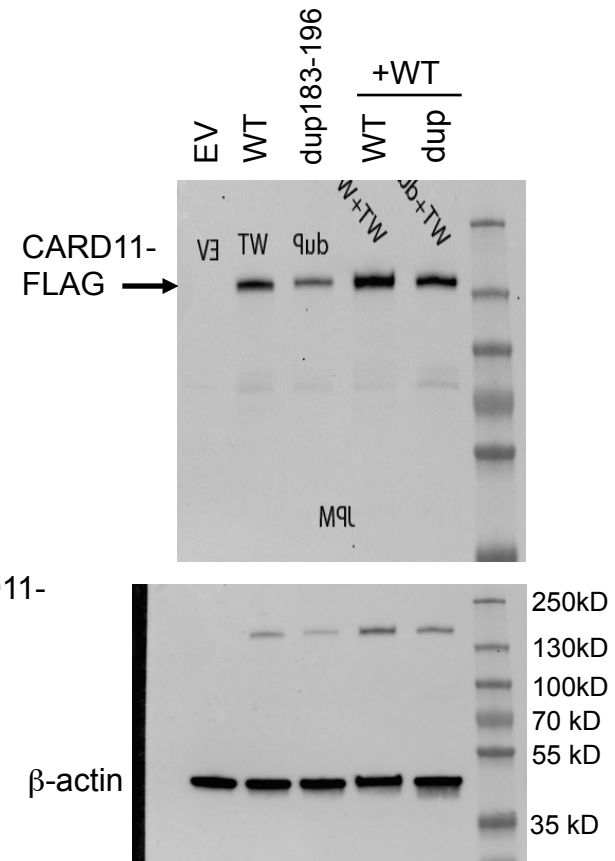

**Fig 2H**

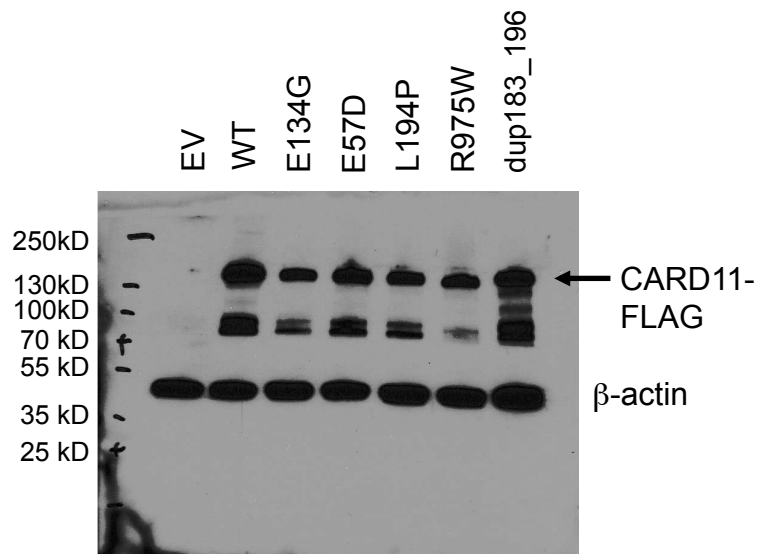

**Fig 2L**

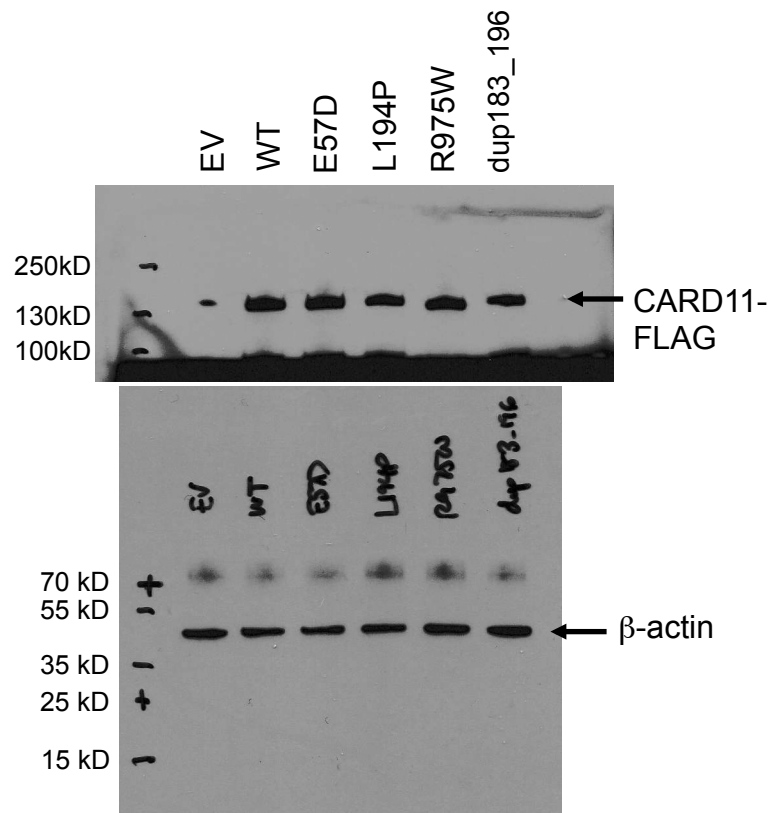

**Fig 3A**

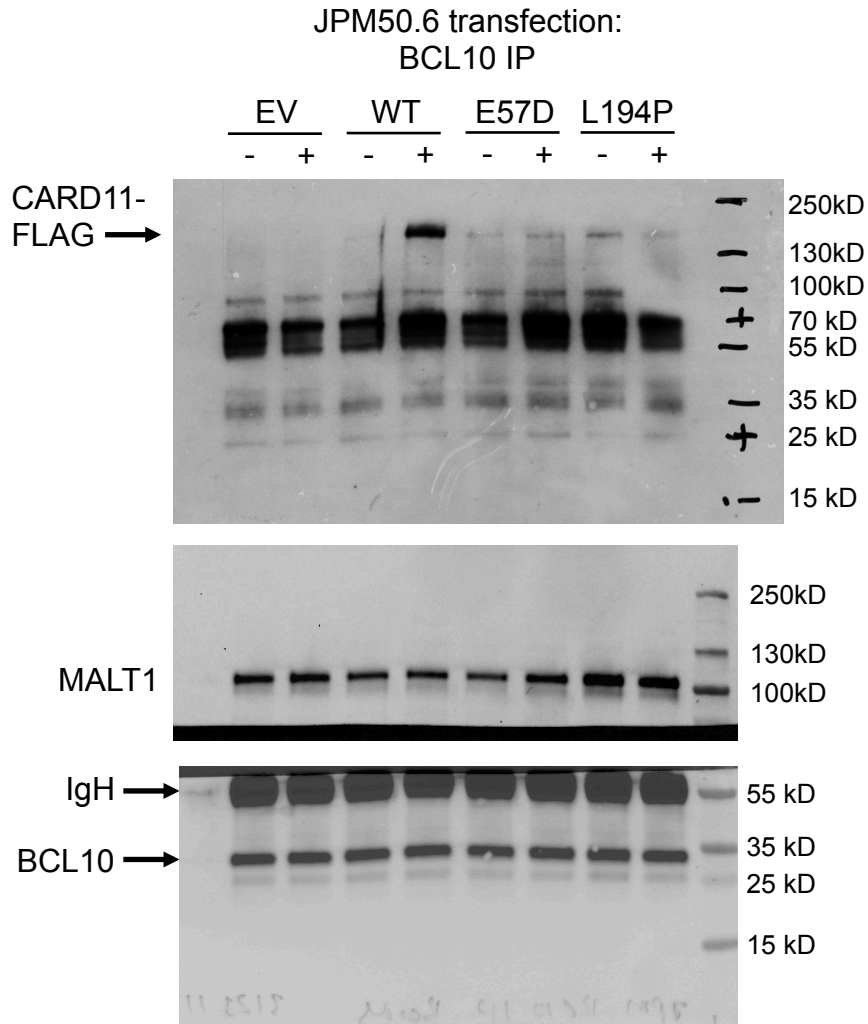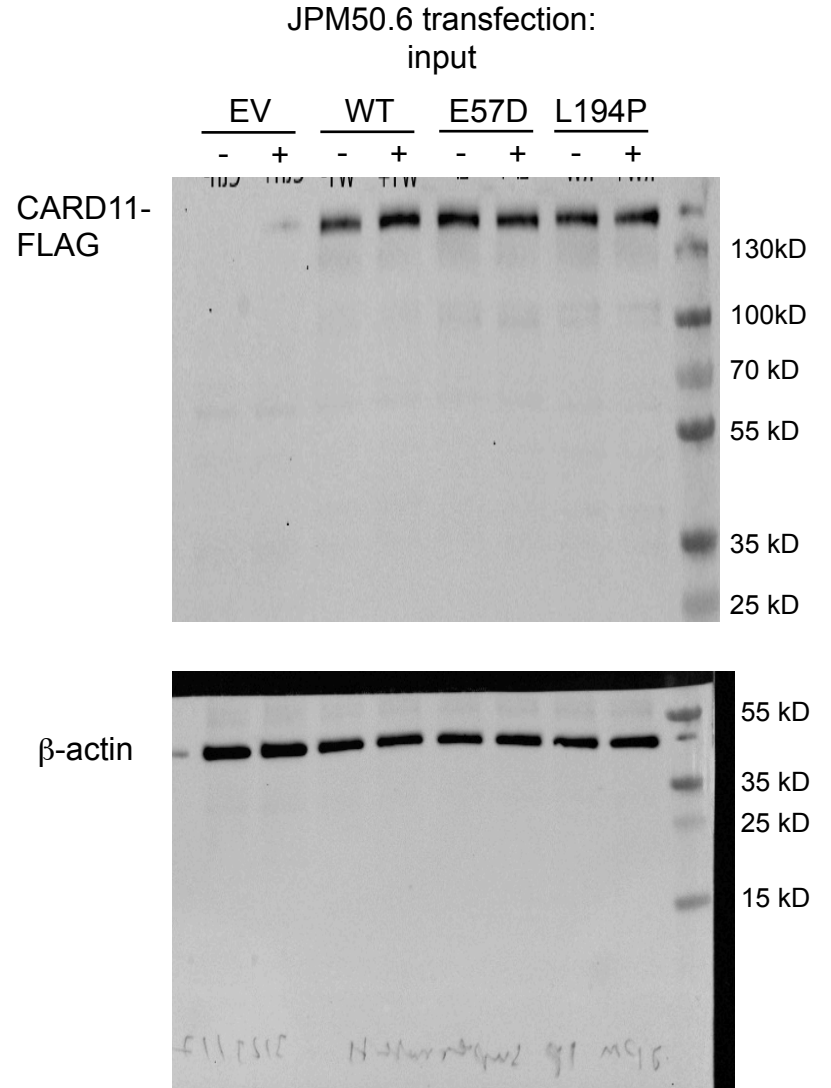

**Fig 3B**

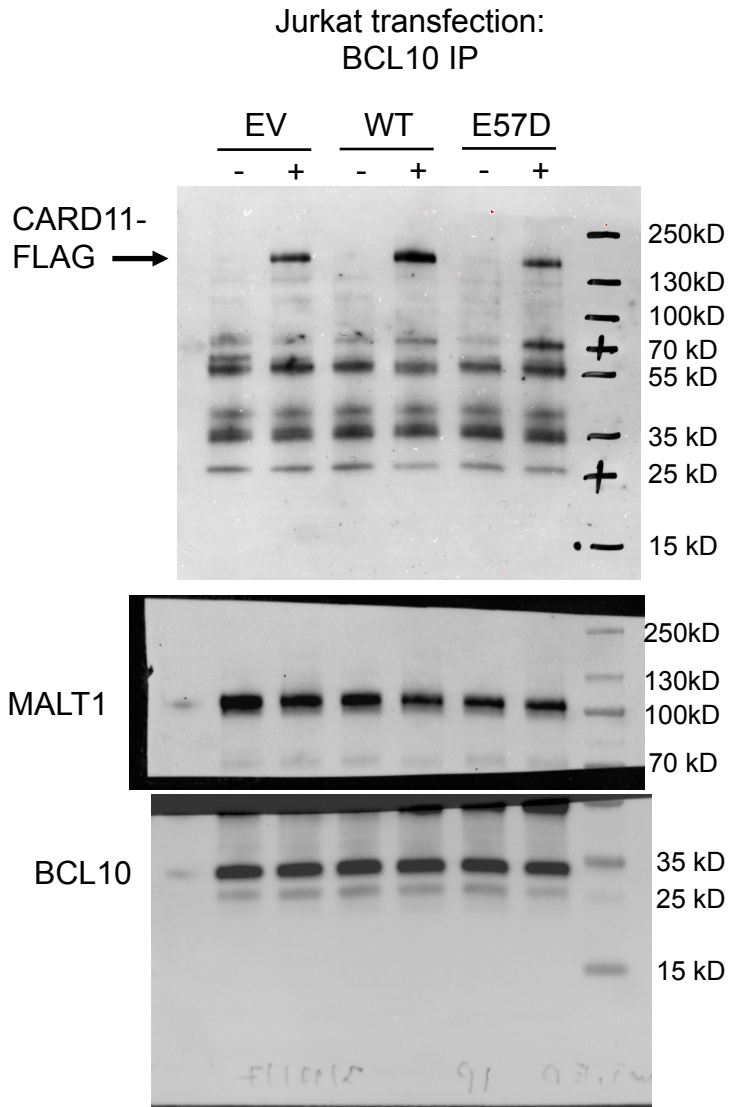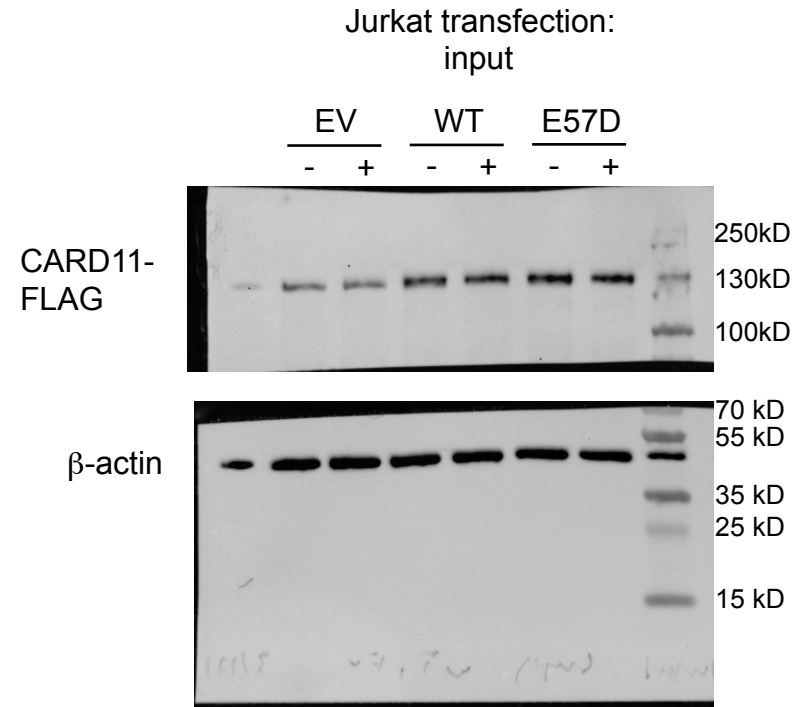

**Fig 3C**

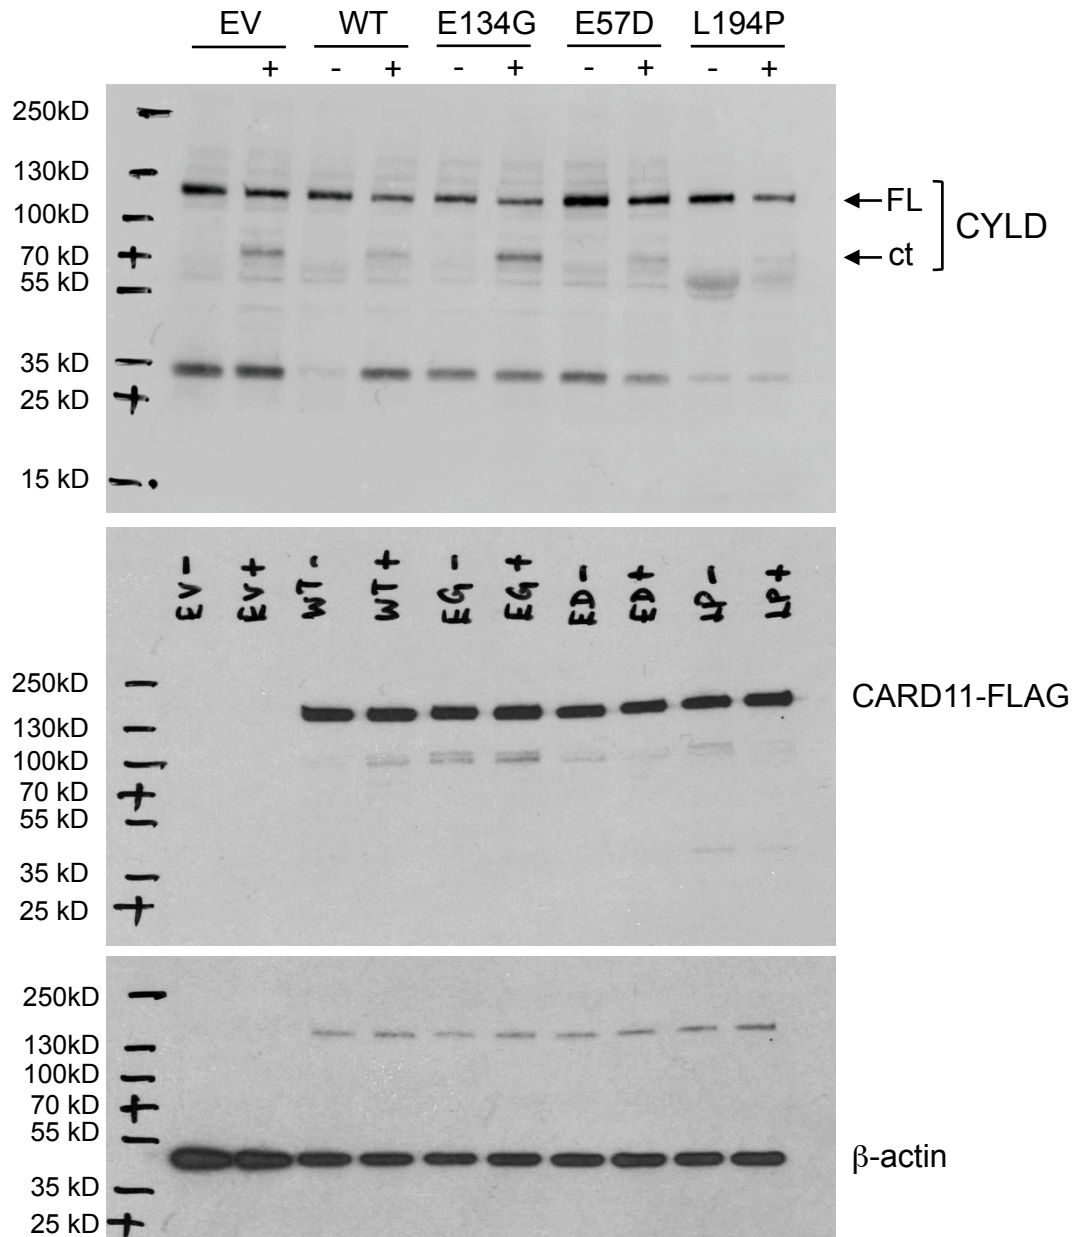

**Supp Fig 1E**

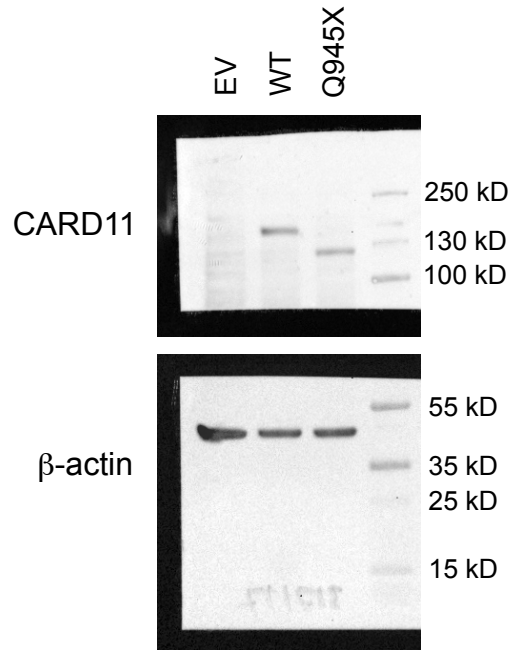

**Supp Fig 1H**

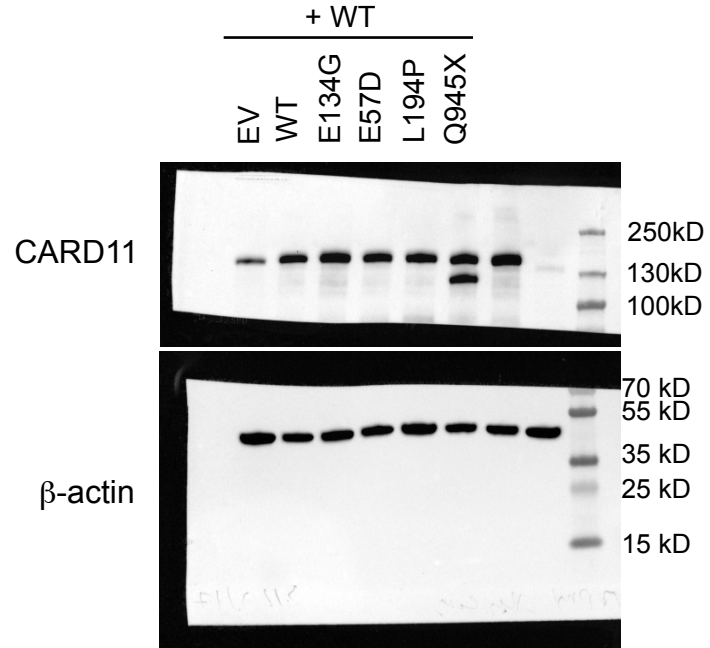

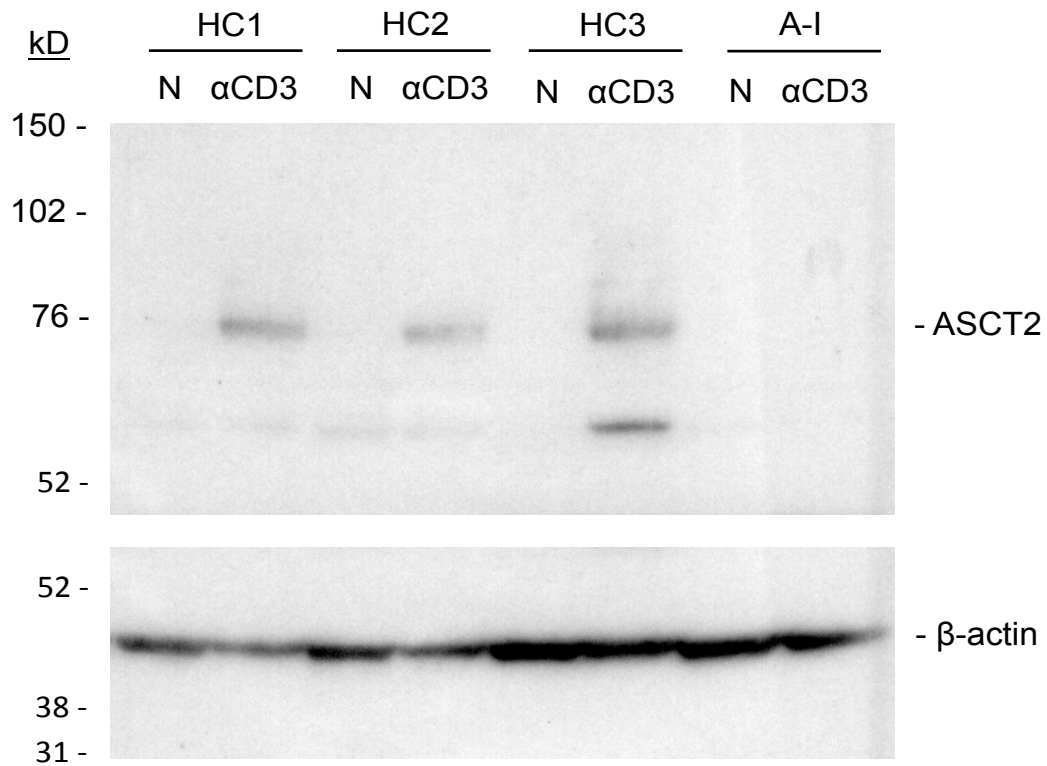

Full-length immunoblot of Figure 5E shows glycosylated ASCT2 at approximately 75 kD (N: non-stimulated).
